# Supplementary material for: Modeling the inhibition effect of straw checkerboard barriers on wind-blown sand
Source: Copernicus journal article supplement (doi:10.5194/esurf-11-167-2023), 2023-03-13
Supplement: Supplementary file 1 [file esurf-11-167-2023-supplement.zip]

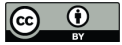

## *Supplement of*

# **Modeling the inhibition effect of straw checkerboard barriers on wind-blown sand**

**Haojie Huang**

*Correspondence to:* Haojie Huang (hjhuang@usst.edu.cn)

- esurf-11-167-2023-supplement-title-page.pdf
- Video 1.mp4
- Video 2.mp4

The copyright of individual parts of the supplement might differ from the article licence.
