# Supplementary material for: Modeling the inhibition effect of straw checkerboard barriers on wind-blown sand
Source: Copernicus journal article supplement (doi:10.5194/esurf-11-167-2023), 2023-03-13
Supplement: Supplementary file 2 [file esurf-11-167-2023-supplement.zip]

Archive with 3 entries (3 files):
- esurf-11-167-2023-supplement-title-page.pdf
- Video 1.mp4
- Video 2.mp4
